# Supplementary material
Source: PubMed Central journal article supplement (PMC10173700)

**Supplementary Table 1. Sociodemographic and disease characteristics of patients in MEMS cohort, overall and by BMI category**

| Variable                                                                 | All (n=435)    | <85%ile (n=191) | 85-98%ile (n=189) | ≥99%ile (n=55) | P       |
|--------------------------------------------------------------------------|----------------|-----------------|-------------------|----------------|---------|
| <b>Age at diagnosis in years</b>                                         |                |                 |                   |                |         |
| Median (range)                                                           | 4 (1-18)       | 5 (1-17)        | 4 (1-18)          | 4 (1-18)       | 0.07    |
| Mean (±standard deviation)                                               | 5.9 (4.2)      | 6.4 (4.5)       | 5.5 (3.8)         | 5.8 (3.8)      |         |
| <b>Age at study enrollment in years</b>                                  |                |                 |                   |                |         |
| Median (range)                                                           | 6 (2-19)       | 7 (2-19)        | 6 (2-19)          | 6 (2-19)       | 0.05    |
| Mean (±standard deviation)                                               | 7.5 (4.2)      | 8.0 (4.6)       | 7.0 (3.8)         | 7.4 (4.1)      |         |
| <b>Length of follow-up in years</b>                                      |                |                 |                   |                |         |
| Median (range)                                                           | 7.9 (0.2-10.6) | 7.9 (0.2-10.0)  | 8.1 (0.5-10.6)    | 7.7 (0.2-9.5)  | 0.2     |
| <b>Sex, n (%)</b>                                                        |                |                 |                   |                |         |
| Male                                                                     | 293 (67.4)     | 130 (68.1)      | 123 (65.1)        | 40 (72.7)      | 0.5     |
| <b>Race/ethnicity, n (%)</b>                                             |                |                 |                   |                |         |
| Non-Hispanic White                                                       | 147 (33.8)     | 76 (39.8)       | 59 (31.2)         | 12 (21.8)      | 0.0003  |
| Hispanic                                                                 | 156 (35.9)     | 54 (28.3)       | 69 (36.5)         | 33 (60.0)      |         |
| African-American or Black                                                | 66 (15.2)      | 24 (12.6)       | 37 (19.6)         | 5 (9.1)        |         |
| Asian                                                                    | 66 (15.2)      | 37 (19.4)       | 24 (12.7)         | 5 (9.1)        |         |
| <b>Parental education, n (%)</b>                                         |                |                 |                   |                |         |
| ≤High school                                                             | 144 (33.7)     | 60 (31.9)       | 59 (31.7)         | 25 (47.2)      | 0.09    |
| <b>Yearly Household Income, n (%)</b>                                    |                |                 |                   |                |         |
| <\$50,000                                                                | 249 (60.1)     | 104 (58.1)      | 103 (56.6)        | 42 (79.3)      | 0.009   |
| <b>Socioeconomic Strata, n (%)</b>                                       |                |                 |                   |                |         |
| Low SES                                                                  | 125 (30.3)     | 52 (29.2)       | 49 (26.9)         | 24 (45.3)      | 0.07    |
| <b>ALL<sup>1</sup> sub-type, n (%)</b>                                   |                |                 |                   |                |         |
| B-lymphoblastic leukemia                                                 | 386 (88.7)     | 167 (87.4)      | 522 (90)          | 50 (90.9)      | 0.7     |
| T-lymphoblastic leukemia                                                 | 45 (10.3)      | 22 (11.5)       | 67 (10)           | 5 (9.1)        |         |
| <b>NCI<sup>2</sup> Risk Group, n (%)</b>                                 |                |                 |                   |                |         |
| High Risk                                                                | 172 (39.7)     | 87 (45.8)       | 65 (34.6)         | 20 (36.4)      | 0.07    |
| <b>Cytogenetics, n (%)</b>                                               |                |                 |                   |                |         |
| Favorable                                                                | 183 (42.1)     | 76 (40.8)       | 82 (43.4)         | 25 (45.5)      | 0.5     |
| Neutral                                                                  | 231 (53.1)     | 105 (55.0)      | 100 (52.9)        | 26 (47.3)      |         |
| Unfavorable <sup>@</sup>                                                 | 21 (4.8)       | 10 (5.2)        | 7 (3.7)           | 4 (8.0)        |         |
| <b>BMI%ile<sup>3</sup></b>                                               |                |                 |                   |                |         |
| Median (range)                                                           | 88.4 (0-100)   | 64.3 (1.1-84.9) | 94.4 (85.2-99)    | 99.5 (99-100)  | <0.0001 |
| <b>6MP dose intensity<sup>5</sup></b>                                    |                |                 |                   |                |         |
| Median (range)                                                           | 0.87 (0.2-3.0) | 0.8 (0.2-3.0)   | 0.87 (0.2-1.67)   | 0.9 (0.4-1.5)  | 0.4     |
| <b>6MP Adherence</b>                                                     |                |                 |                   |                |         |
| Mean (SD)                                                                | 90.9 (14.4)    | 91.6 (15.4)     | 91.7 (13.3)       | 89.8 (15.2)    | 0.4     |
| <b>Erythrocyte TGN<sup>6</sup>, pmol/8 × 10<sup>8</sup> erythrocytes</b> |                |                 |                   |                |         |

| <b>Variable</b>                                            | <b>All (n=435)</b> | <b>&lt;85%ile (n=191)</b> | <b>85-98%ile (n=189)</b> | <b>≥99%ile (n=55)</b> | <b>P</b> |
|------------------------------------------------------------|--------------------|---------------------------|--------------------------|-----------------------|----------|
| Median (range)                                             | 139.5 (0.3-453.7)  | 137.9 (0.3-453.7)         | 147.2 (0.7-432.9)        | 138.2 (63.2-306.2)    | 0.8      |
| CV %, median (range)                                       | 28.8 (1.4-207.3)   | 28.8 (1.4-207.3)          | 28.4 (1.7-166.0)         | 30.2 (6.3- 89.9)      | 0.5      |
| <b>Methotrexate dose intensity</b>                         |                    |                           |                          |                       |          |
| Median (range)                                             | 0.87 (0.2-2.73)    | 0.85 (0.2-2.73)           | 0.89 (0.2-1.5)           | 0.89 (0.3-1.5)        | 0.7      |
| <b>Days oral chemotherapy held for toxicity or illness</b> |                    |                           |                          |                       |          |
| Median (range)                                             | 0 (0-56)           | 0 (0-56)                  | 0 (0-48)                 | 0 (0-48)              | 0.7      |

<sup>1</sup>ALL denotes acute lymphoblastic leukemia; <sup>2</sup>NCI denotes National Cancer Institute; <sup>3</sup>BMI denotes body-mass index; <sup>4</sup>CV denotes coefficient of variation, <sup>5</sup>6MP denotes 6-mercaptopurine; <sup>6</sup>TGN denotes thioguanine. Favorable cytogenetics included t(12;21); hyperdiploidy; trisomy 4 and 10; or trisomy 4, 10, and 17. Unfavorable cytogenetics included t(9;22), t(4;11), hypodiploidy, or extreme hypodiploidy. Neutral cytogenetics implied absence of favorable or unfavorable cytogenetics

**Supplementary Table 2.** Comparison of MEMS cohort and non-MEMS cohort

| Variable                                                                 | MEMS Cohort       | Non-MEMS Cohort   | P    |
|--------------------------------------------------------------------------|-------------------|-------------------|------|
| <b>Age at diagnosis in years</b>                                         |                   |                   |      |
| Median (range)                                                           | 4 (1-18)          | 5 (1-17)          | 0.04 |
| <b>Age at study enrollment in years</b>                                  |                   |                   |      |
| Median (range)                                                           | 6 (2-19)          | 6 (2-19)          | 0.06 |
| <b>Length of follow-up in years</b>                                      |                   |                   |      |
| Median (range)                                                           | 7.9 (0.2-10.6)    | 7.5 (0.1-13.0)    | 0.8  |
| <b>Sex, n (%)</b>                                                        |                   |                   |      |
| Male                                                                     | 293 (67.4)        | 171 (71.0)        | 0.3  |
| <b>Race/ethnicity, n (%)</b>                                             |                   |                   |      |
| Non-Hispanic White                                                       | 147 (33.8)        | 78 (32.8)         | 0.06 |
| Hispanic White                                                           | 156 (35.9)        | 69 (28.6)         |      |
| African-American or Black                                                | 66 (15.2)         | 54 (22.4)         |      |
| Asian                                                                    | 66 (15.2)         | 40 (16.6)         |      |
| <b>Parental education, n (%)</b>                                         |                   |                   |      |
| ≤High school                                                             | 144 (33.7)        | 83 (36.2)         | 0.5  |
| >High school                                                             | 283 (66.3)        | 146 (63.8)        |      |
| <b>Yearly Household Income, n (%)</b>                                    |                   |                   |      |
| <\$50,000                                                                | 249 (60.1)        | 123 (57.8)        | 0.6  |
| ≥\$50,000                                                                | 165 (39.9)        | 90 (42.2)         |      |
| <b>ALL<sup>1</sup> sub-type, n (%)</b>                                   |                   |                   |      |
| B-lymphoblastic leukemia                                                 | 386 (88.9)        | 208 (87.0)        | 0.6  |
| T-lymphoblastic leukemia                                                 | 45 (10.4)         | 30 (13.0)         |      |
| <b>NCI<sup>2</sup> Risk Group, n (%)</b>                                 |                   |                   |      |
| Standard Risk                                                            | 261 (60.3)        | 128 (53.8)        | 0.1  |
| High Risk                                                                | 172 (39.7)        | 110 (46.2)        |      |
| <b>Cytogenetics, n (%)</b>                                               |                   |                   |      |
| Favorable                                                                | 183 (44.9)        | 86 (38.2)         | 0.2  |
| Neutral                                                                  | 204 (50.0)        | 122 (54.2)        |      |
| Unfavorable                                                              | 21 (5.1)          | 17 (7.6)          |      |
| <b>BMI<sup>3</sup>ile<sup>3</sup></b>                                    |                   |                   |      |
| Median (range)                                                           | 88.4 (1.1-100)    | 88.6 (0-100)      | 0.9  |
| <b>6MP<sup>5</sup> dose intensity</b>                                    |                   |                   |      |
| Median (range)                                                           | 0.87 (0.2-2.97)   | 0.88 (0.0-2.1)    | 0.1  |
| CV (range)                                                               | 13.5 (0-73.5)     | 13.1 (0-102.9)    | 0.3  |
| <b>Erythrocyte TGN<sup>6</sup>, pmol/8 × 10<sup>8</sup> erythrocytes</b> |                   |                   |      |
| Median (range)                                                           | 139.5 (0.3-453.7) | 141.8 (0.0-473.9) | 0.3  |
| CV%, median (range)                                                      | 28.8 (1.4-207.3)  | 30.5 (0-241.2)    | 0.06 |
| <b>Methotrexate dose intensity</b>                                       |                   |                   |      |
| Median (range)                                                           | 0.87 (0.2-2.73)   | 0.88 (0.1-2.03)   | 0.1  |

<sup>1</sup>ALL denotes acute lymphoblastic leukemia; <sup>2</sup>NCI denotes National Cancer Institute; <sup>3</sup>BMI denotes body-mass index; <sup>4</sup>CV denotes coefficient of variation, <sup>5</sup>6MP denotes 6-mercaptopurine; <sup>6</sup>TGN denotes thioguanine. Favorable cytogenetics included t(12;21); hyperdiploidy; trisomy 4 and 10; or trisomy 4, 10, and 17. Unfavorable cytogenetics included t(9;22), t(4;11), hypodiploidy, or extreme hypodiploidy. Neutral cytogenetics implied absence of favorable or unfavorable cytogenetics.

**Supplementary Table 3.** Factors associated with extreme obesity during maintenance therapy for ALL

| <b>Variable</b>                        | <b>OR* (95% CI)</b> | <b>P</b> |
|----------------------------------------|---------------------|----------|
| Age at diagnosis (per year increase)   | 1.1 (0.9-1.1)       | 0.9      |
| Female sex (vs male)                   | 1.1 (0.7-1.9)       | 0.7      |
| Race/ethnicity (vs non-Hispanic white) |                     |          |
| Hispanic                               | 2.0 (1.03-3.9)      | 0.02     |
| African-American or Black              | 0.9 (0.4-1.9)       | 0.8      |
| Asian                                  | 0.9 (0.4-2.2)       | 0.6      |
| Low socioeconomic strata (vs high)     | 1.6 (0.9-2.8)       | 0.2      |

\*Multivariable logistic regression analysis

**Supplementary Table 4. Hazard of relapse by BMI%ile category among participants in MEMS sub-cohort**

|                | BMI ≥99%ile vs <85%ile |          | BMI 85-98%ile vs <85%ile |          |
|----------------|------------------------|----------|--------------------------|----------|
|                | HR (95%CI)             | <i>P</i> | HR (95%CI)               | <i>P</i> |
| <b>Model 1</b> | 3.0 (1.3-6.5)          | 0.007    | 1.1 (0.5-2.2)            | 0.9      |
| <b>Model 2</b> | 4.0 (1.7-9.4)          | 0.002    | 1.2 (0.6-2.7)            | 0.6      |
| <b>Model 3</b> | 3.8 (1.6-8.8)          | 0.002    | 1.2 (0.5-2.5)            | 0.7      |
| <b>Model 4</b> | 3.1 (1.3-7.4)          | 0.009    | 1.0 (0.4-2.1)            | 0.9      |
| <b>Model 5</b> | 3.5 (1.5-8.6)          | 0.005    | 0.9 (0.3-2.2)            | 0.7      |
| <b>Model 6</b> | 3.5 (1.5-8.5)          | 0.005    | 0.8 (0.3-2.2)            | 0.7      |
| <b>Model 7</b> | 3.3 (1.4-8.2)          | 0.006    | 0.8 (0.3-2.1)            | 0.7      |
| <b>Model 8</b> | 3.6 (1.5-8.5)          | 0.004    | 0.8 (0.3-2.0)            | 0.7      |

HR denotes hazard ratio, 95%CI denotes 95% confidence interval

**Model 1** shows unadjusted HR for relapse risk by BMI category

**Model 2** shows adjusted HR for relapse risk by BMI category, adjusting for age at study entry, sex, NCI risk, cytogenetics, median 6MP dose intensity, median methotrexate dose intensity, number of days chemotherapy held due to toxicity/illness and time from start of maintenance to study entry

**Model 3** adds to socioeconomic strata to covariates included in model 2

**Model 4** adds race/ethnicity to covariates included in model 3

**Model 5** adds mean adherence to model 4

**Model 6** adds median TGN levels to covariates included in model 5

**Model 7** removes median TGN and adds TGN CV% to covariates included in model 6

**Model 8** substitutes NCI risk with disease phenotype (B-cell vs T-cell [reference]) in Model 6

**Supplementary Table 5. Hazard of relapse by BMI%ile category among participants defining extreme obesity as BMI  $\geq$ 120% of 95%ile vs <85%ile**

|                | Entire cohort |          | MEMS cohort   |          |
|----------------|---------------|----------|---------------|----------|
|                | HR (95%CI)    | <i>P</i> | HR (95%CI)    | <i>P</i> |
| <b>Model 1</b> | 3.2 (1.6-6.3) | 0.008    | 3.6 (1.7-7.9) | 0.001    |
| <b>Model 2</b> | 3.4 (1.8-6.4) | 0.002    | 4.0 (1.9-8.3) | 0.0003   |
| <b>Model 3</b> | 3.3 (1.8-6.3) | 0.002    | 3.8 (1.8-7.8) | 0.0004   |
| <b>Model 4</b> | 2.9 (1.5-5.7) | 0.002    | 3.1 (1.4-6.6) | 0.004    |
| <b>Model 5</b> | -             | -        | 3.7 (1.6-8.6) | 0.002    |
| <b>Model 6</b> | 2.9 (1.5-5.7) | 0.002    | 3.8 (1.6-8.6) | 0.002    |
| <b>Model 7</b> | 3.2 (1.6-6.4) | 0.001    | 3.5 (1.5-8.0) | 0.003    |

HR denotes hazard ratio, 95%CI denotes 95% confidence interval

**Model 1** shows unadjusted HR for relapse risk by BMI category

**Model 2** shows adjusted HR for relapse risk by BMI category, adjusting for age at study entry, sex, NCI risk, cytogenetics, median 6MP dose intensity, median methotrexate dose intensity, number of days chemotherapy held due to toxicity/illness and time from start of maintenance to study entry

**Model 3** adds socioeconomic strata to covariates included in model 2

**Model 4** adds race/ethnicity to covariates included in model 3

**Model 5** adds mean adherence to model 4 for MEMS cohort

**Model 6** adds median TGN levels to covariates included in model 4 (4A for MEMS cohort)

**Model 7** removes median TGN and adds TGN CV% to covariates included in model 5

**Supplementary Table 6.** Hazard of relapse by BMI%ile category among all participants with full model effects

| Characteristic                                                               | Model 1       |      | Model 2        |       | Model 3        |       | Model 4        |      | Model 5        |      | Model 6        |      |
|------------------------------------------------------------------------------|---------------|------|----------------|-------|----------------|-------|----------------|------|----------------|------|----------------|------|
|                                                                              | HR (95% CI)   | P    | HR (95% CI)    | P     | HR (95% CI)    | P     | HR (95% CI)    | P    | HR (95% CI)    | P    | HR (95% CI)    | P    |
| <b>BMI ≥99%ile vs. &lt;85%ile</b>                                            | 2.4 (1.2-4.7) | 0.01 | 2.7 (1.3-5.7)  | 0.007 | 2.8 (1.3-5.7)  | 0.006 | 2.4 (1.1-5.1)  | 0.02 | 2.4 (1.1-5.1)  | 0.02 | 2.5 (1.2-5.5)  | 0.02 |
| <b>BMI 85-98%ile vs. &lt;85%ile</b>                                          | 0.9 (0.5-1.6) | 0.7  | 1.0 (0.5-1.8)  | 0.9   | 0.9 (0.5-1.7)  | 0.8   | 0.8 (0.4-1.6)  | 0.6  | 0.8 (0.4-1.6)  | 0.6  | 0.9 (0.4-1.7)  | 0.7  |
| Age at study entry (per year increase)                                       | -             | -    | 1.0 (1.0-1.1)  | 0.3   | 1.0 (1.0-1.1)  | 0.2   | 1.0 (1.0-1.1)  | 0.2  | 1.0 (1.0-1.1)  | 0.2  | 1.0 (1.0-1.1)  | 0.3  |
| Sex (female vs male)                                                         | -             | -    | 0.9 (0.5-1.7)  | 0.8   | 0.9 (0.5-1.7)  | 0.8   | 0.9 (0.5-1.6)  | 0.7  | 0.9 (0.5-1.6)  | 0.7  | 0.9 (0.5-1.7)  | 0.7  |
| NCl risk group (high vs low)                                                 | -             | -    | 0.9 (0.4-1.9)  | 0.9   | 1.0 (0.5-2.0)  | 0.9   | 1.0 (0.5-2.0)  | 0.9  | 0.9 (0.4-2.0)  | 0.9  | 1.0 (0.5-2.1)  | 0.9  |
| Favorable cytogenetics vs unfavorable                                        | -             | -    | 0.9 (0.3-2.6)  | 0.8   | 0.9 (0.3-2.6)  | 0.8   | 0.9 (0.3-2.6)  | 0.8  | 0.9 (0.3-2.6)  | 0.8  | 0.9 (0.3-2.7)  | 0.9  |
| Neutral cytogenetics vs unfavorable                                          | -             | -    | 0.5 (0.3-1.0)  | 0.1   | 0.6 (0.3-1.0)  | 0.1   | 0.5 (0.3-1.0)  | 0.1  | 0.5 (0.3-1.0)  | 0.1  | 0.5 (0.3-1.0)  | 0.1  |
| Median 6MP dose intensity                                                    | -             | -    | 3.7 (0.6-23.7) | 0.2   | 3.5 (0.5-22.9) | 0.2   | 2.9 (0.5-18.3) | 0.3  | 2.9 (0.5-18.7) | 0.3  | 3.3 (0.5-20.9) | 0.2  |
| Median methotrexate dose intensity                                           | -             | -    | 0.3 (0.0-2.2)  | 0.2   | 0.3 (0.0-2.2)  | 0.2   | 0.3 (0.0-2.2)  | 0.3  | 0.3 (0.0-2.3)  | 0.3  | 0.3 (0.0-2.3)  | 0.3  |
| Number of days chemotherapy held due to toxicity/ illness (per day increase) | -             | -    | 1.0 (1.0-1.0)  | 0.4   | 1.0 (1.0-1.0)  | 0.4   | 1.0 (1.0-1.0)  | 0.6  | 1.0 (1.0-1.0)  | 0.6  | 1.0 (1.0-1.0)  | 0.6  |
| Time from start of maintenance                                               | -             | -    | 0.4 (0.2-0.8)  | 0.01  | 0.4 (0.2-0.8)  | 0.01  | 0.4 (0.2-0.8)  | 0.01 | 0.4 (0.2-0.8)  | 0.01 | 0.4 (0.2-0.8)  | 0.01 |
| Low SES vs others                                                            | -             | -    | -              | -     | 1.0 (1.0-1.0)  | 0.2   | 1.0 (1.0-1.0)  | 0.2  | 1.0 (1.0-1.0)  | 0.1  | 1.0 (1.0-1.0)  | 0.1  |
| Asian race vs Non-Hispanic Whites                                            | -             | -    | -              | -     | -              | -     | 1.6 (0.6-4.0)  | 0.3  | 1.6 (0.6-4.1)  | 0.3  | 1.5 (0.6-3.9)  | 0.4  |
| Black vs Non-Hispanic Whites                                                 | -             | -    | -              | -     | -              | -     | 1.4 (0.6-3.7)  | 0.4  | 1.4 (0.6-3.7)  | 0.4  | 1.5 (0.6-3.7)  | 0.4  |
| Hispanic vs Non-Hispanic Whites                                              | -             | -    | -              | -     | -              | -     | 2.3 (1.2-4.6)  | 0.02 | 2.3 (1.2-4.7)  | 0.02 | 2.1 (1.0-4.3)  | 0.02 |
| Median TGN (per pmol/8x10 <sup>8</sup> erythrocytes increase)                | -             | -    | -              | -     | -              | -     | -              | -    | 1.0 (0.9-1.0)  | 0.7  | -              | -    |
| TGN CV% (per % variation increase)                                           | -             | -    | -              | -     | -              | -     | -              | -    | -              | -    | 1.0 (0.9-1.0)  | 0.3  |

HR denotes hazard ratio, 95%CI denotes 95% confidence interval

**Supplementary Figure 1. Study Schema for AALL03N1**

Used with permission from report by Landier et al, *Blood*. 2017;129(14):1919-1926

|                           | ← 6 months → |        |        |          |            |            |            |
|---------------------------|--------------|--------|--------|----------|------------|------------|------------|
|                           | Day 1        | Day 29 | Day 57 | Day 85/1 | Day 113/29 | Day 141/57 | Day 169/85 |
| Assent / consent          | X            |        |        |          |            |            |            |
| Demographic questionnaire |              | X      |        |          |            |            |            |
| Self-report of 6MP intake |              | X      | X      |          | X          | X          |            |
| MEMS monitoring of 6MP    | →            |        |        |          |            |            |            |
| MEMS data download        |              |        |        |          |            |            | X          |
| TPMT genotype             | X            |        |        |          |            |            |            |
| Red cell TGN levels       |              | X      | X      | X        | X          | X          | X          |

Abbreviations: 6MP, 6-mercaptopurine; MEMS, Medication Event Monitoring System; TPMT, thiopurine methyltransferase; TGN, erythrocyte thioguanine nucleotide concentrations



**Supplementary Figure 2. Fitted means of erythrocyte thioguanine in patients with available adherence data (n=435)**

Models adjusted for age at study enrollment, race/ethnicity, sex, 6MP dose intensity, adherence and study month

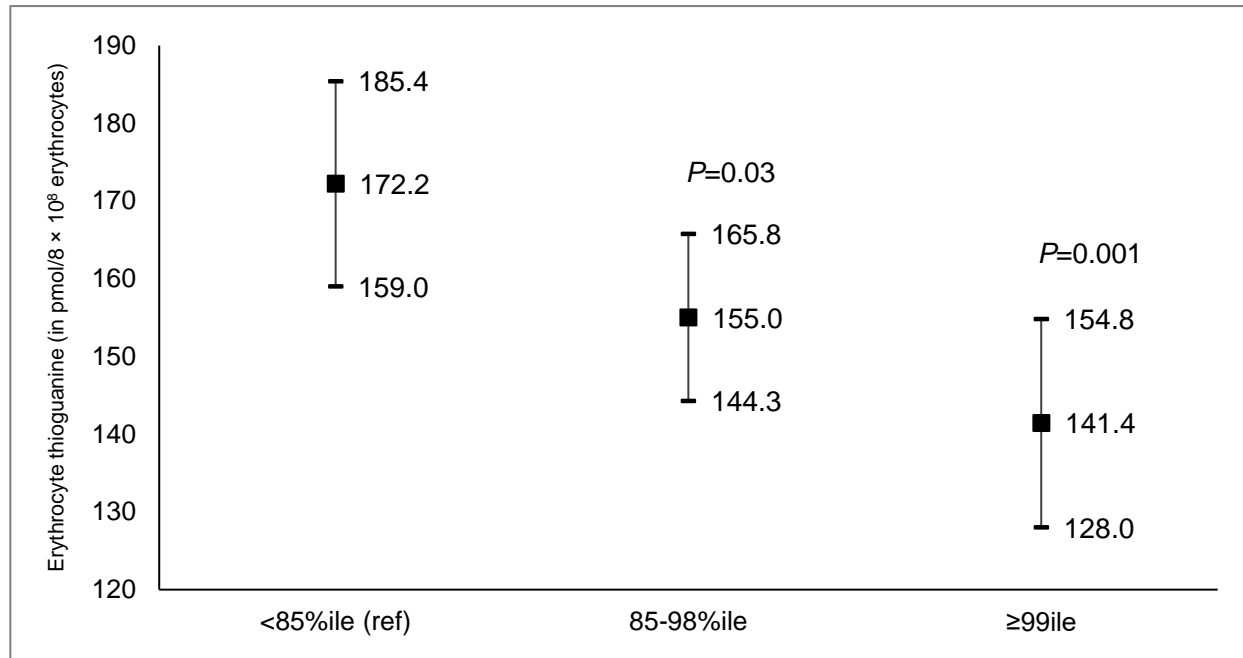

Supplement: NIHMS1893701-supplement-supinfo.pdf [file NIHMS1893701-supplement-supinfo.pdf]
